# Supplementary material for: Association of the CACNA2D2 gene with schizophrenia in Chinese Han population
Source: PeerJ. 2020 Feb 5;8:e8521. doi: 10.7717/peerj.8521 (PMC7007731; doi:10.7717/peerj.8521)
Supplement: Supplemental Information 1 [file peerj-08-8521-s001.xlsx]

## Sheet: 总库
SAMPLE ID	GENDER	AGE	GROUP	rs12496815	rs3806706	rs45536634
2	Male	34	1	NA	NA	NA
3	Male	34	1	NA	G/C	G/G
4	Male	52	1	NA	G/C	G/G
6	Male	52	1	NA	G/G	G/G
13	Female	56	1	NA	G/C	NA
18	Female	34	1	NA	G/C	G/G
19	Female	21	1	NA	NA	NA
22	Female	49	1	NA	NA	NA
23	Female	26	1	NA	G/G	NA
27	Male	50	1	NA	NA	NA
28	Male	23	1	NA	C/C	NA
32	Female	32	1	NA	G/G	NA
66	Male	45	1	NA	C/C	G/G
73	Female	23	1	NA	NA	NA
77	Female	29	1	NA	G/C	G/G
80	Female	38	1	NA	G/C	G/G
82	Female	43	1	NA	NA	NA
234	Female	24	1	NA	G/G	G/A
235	Female	52	1	G/A	G/C	G/G
239	Female	35	1	G/A	C/C	G/G
242	Female	24	1	A/A	G/C	G/G
244	Male	47	1	NA	NA	NA
248	Female	36	1	NA	G/G	NA
249	Female	28	1	NA	NA	NA
270	Male	56	1	NA	G/G	G/G
272	Male	50	1	NA	G/C	G/G
275	Female	37	1	NA	G/G	G/A
277	Male	36	1	NA	G/G	G/G
287	Male	48	1	NA	G/G	G/G
302	Male	18	1	NA	G/C	G/A
547	Female	24	1	NA	G/C	G/G
562	Female	18	1	NA	G/G	G/A
590	Male	31	1	NA	G/G	G/G
595	Male	18	1	NA	G/C	G/G
736	Male	32	1	NA	G/G	NA
106	Female	37	1	A/A	G/C	G/G
423	Male	21	1	NA	NA	NA
648	Male	38	1	A/A	C/C	G/G
665	Male	25	1	A/A	G/G	G/G
676	Male	38	1	A/A	G/C	G/G
679	Male	50	1	A/A	G/C	G/G
731	Male	20	1	A/A	G/C	G/G
762	Female	27	1	NA	G/C	G/G
784	Male	26	1	NA	C/C	G/G
860	Male	20	1	A/A	G/C	G/G
895	Male	30	1	G/A	G/C	G/G
980	Male	35	1	A/A	G/G	G/G
991	Female	29	1	A/A	C/C	G/G
1149	Female	48	1	NA	G/C	G/G
252	Female	17	1	NA	G/C	G/G
371	Male	23	1	A/A	C/C	G/G
385	Male	27	1	G/A	C/C	G/G
615	Male	23	1	A/A	G/C	G/G
668	Male	44	1	A/A	G/C	G/G
728	Female	47	1	A/A	G/C	G/G
742	Male	48	1	G/A	G/C	G/G
746	Male	29	1	A/A	G/G	G/G
752	Male	36	1	A/A	C/C	G/G
779	Male	32	1	A/A	C/C	G/G
787	Male	51	1	A/A	G/C	G/G
841	Female	37	1	A/A	C/C	G/G
863	Male	37	1	A/A	G/C	G/G
1124	Female	31	1	A/A	C/C	G/G
1145	Female	26	1	A/A	C/C	G/G
1163	Female	38	1	NA	G/C	G/G
1179	Male	18	1	A/A	C/C	G/G
364	Male	41	1	A/A	G/G	G/G
368	Male	39	1	A/A	G/C	G/G
750	Male	37	1	NA	G/C	G/G
798	Male	23	1	G/A	G/C	G/G
1162	Female	36	1	NA	G/C	G/G
574	Male	43	1	A/A	G/G	G/G
263	Male	43	1	A/A	G/G	G/G
388	Female	24	1	A/A	G/G	G/G
667	Male	35	1	A/A	G/C	G/G
735	Male	28	1	A/A	G/C	G/G
766	Male	21	1	A/A	G/C	G/G
805	Male	41	1	NA	G/C	G/G
821	Male	21	1	G/A	G/G	G/G
464	Female	27	1	A/A	G/G	G/G
490	Female	39	1	A/A	G/C	G/G
845	Male	42	1	A/A	G/C	G/G
205	Female	49	1	NA	G/C	G/G
393	Male	49	1	A/A	G/G	G/G
353	Male	28	1	A/A	G/C	G/G
378	Male	32	1	A/A	G/C	G/G
386	Male	64	1	A/A	G/C	G/G
454	Female	26	1	G/A	G/C	G/G
470	Female	24	1	A/A	G/G	G/G
743	Male	48	1	G/A	G/C	G/G
899	Male	26	1	A/A	G/G	G/G
966	Male	52	1	A/A	G/G	G/G
1169	Male	18	1	A/A	G/C	G/G
994	Male	30	1	A/A	G/C	G/G
209	Female	36	1	A/A	G/C	G/G
444	Male	37	1	A/A	G/C	G/G
653	Male	48	1	A/A	G/G	G/G
854	Female	22	1	A/A	G/C	G/G
465	Male	33	1	A/A	G/G	G/G
828	Male	44	1	A/A	C/C	G/G
448	Male	35	1	A/A	G/C	G/G
935	Male	17	1	A/A	G/C	G/G
289	Male	52	1	A/A	G/C	G/G
436	Male	20	1	A/A	G/C	G/G
497	Male	37	1	A/A	G/C	G/G
379	Male	23	1	A/A	G/G	G/G
522	Male	31	1	A/A	G/C	G/G
401	Male	34	1	A/A	C/C	G/G
140	Male	44	1	A/A	G/G	G/G
463	Female	60	1	A/A	G/G	G/G
10079	Female	25	1	G/A	G/C	G/G
354	Male	28	1	G/A	C/C	G/G
719	Female	47	1	A/A	G/C	G/G
40088	Male	20	1	A/A	G/C	G/G
3814	Male	43	1	A/A	C/C	G/G
428	Male	46	1	A/A	G/G	G/G
499	Male	46	1	A/A	C/C	G/G
40102	Male	26	1	A/A	G/C	G/G
40133	Male	29	1	A/A	G/G	G/G
498	Male	19	1	A/A	G/C	G/G
233	Male	48	1	A/A	G/C	G/G
122	Female	37	1	A/A	G/C	G/G
163	Male	41	1	A/A	C/C	G/G
325	Female	27	1	A/A	G/G	G/G
406	Female	42	1	A/A	G/C	G/G
492	Female	58	1	A/A	G/C	G/G
491	Female	18	1	A/A	G/C	G/G
434	Female	34	1	A/A	G/G	G/G
451	Male	45	1	A/A	G/C	G/G
529	Male	32	1	A/A	G/C	G/G
11474	Male	40	1	A/A	G/C	G/G
40104	Male	35	1	A/A	G/C	G/G
409	Male	40	1	A/A	G/G	G/G
413	Male	16	1	A/A	G/C	G/G
440	Male	64	1	A/A	G/C	G/G
10047	Male	46	1	A/A	G/C	G/G
812	Female	48	1	A/A	G/C	G/G
864	Male	43	1	A/A	G/C	G/G
1532	Female	38	1	A/A	G/C	G/G
1840	Female	42	1	A/A	G/C	G/G
2202	Female	19	1	A/A	G/C	G/G
30010	Female	49	1	A/A	G/C	G/G
40101	Female	23	1	A/A	C/C	G/G
40168	Male	24	1	A/A	G/G	G/G
416	Male	47	1	G/A	G/C	G/G
78	Female	55	1	A/A	G/C	G/G
538	Female	19	1	A/A	G/G	G/G
608	Female	31	1	A/A	G/G	G/G
30027	Male	28	1	A/A	G/C	G/G
537	Male	40	1	A/A	G/C	G/G
1016	Male	27	1	A/A	G/C	G/G
1212	Male	22	1	A/A	C/C	G/G
1236	Male	28	1	A/A	G/G	G/G
3219	Female	27	1	A/A	G/C	G/G
11048	Male	49	1	A/A	C/C	G/G
11427	Female	38	1	A/A	C/C	G/G
40111	Male	46	1	A/A	G/G	G/G
C417	Female	46	1	A/A	G/G	G/G
C864	Female	46	1	A/A	G/C	G/G
110	Male	36	1	A/A	G/C	G/G
486	Male	36	1	A/A	G/C	G/G
531	Male	33	1	A/A	G/C	G/G
1225	Male	25	1	A/A	C/C	G/G
10964	Female	34	1	A/A	G/G	G/G
C639	Female	23	1	A/A	G/G	G/G
572	Female	29	1	A/A	G/C	G/G
634	Male	27	1	A/A	G/C	G/G
338	Male	26	1	A/A	C/C	G/G
418	Male	33	1	A/A	G/C	G/G
427	Male	46	1	A/A	G/C	G/G
872	Male	22	1	A/A	G/C	G/G
158	Male	25	1	A/A	G/C	G/G
226	Male	34	1	A/A	C/C	G/G
2804	Female	36	1	A/A	G/G	G/G
10288	Male	28	1	A/A	G/G	G/G
10822	Female	27	1	A/A	C/C	G/G
11527	Male	28	1	A/A	G/C	G/G
40007	Male	22	1	A/A	G/C	G/G
40052	Male	21	1	A/A	G/G	G/G
C885	Male	65	1	A/A	C/C	G/G
Z9	Male	30	1	A/A	C/C	G/G
10156	Male	61	1	A/A	G/C	G/G
40170	Male	27	1	A/A	C/C	G/G
361	Female	46	1	G/G	G/G	G/G
400	Female	35	1	A/A	C/C	G/G
431	Male	17	1	A/A	C/C	G/G
439	Female	45	1	A/A	G/G	G/G
456	Male	42	1	G/A	C/C	G/G
483	Female	26	1	A/A	G/C	G/G
557	Male	34	1	A/A	C/C	G/G
600	Male	43	1	A/A	G/C	G/G
641	Female	28	1	A/A	G/C	G/G
67	Male	27	1	A/A	C/C	G/G
3467	Female	34	1	A/A	C/C	G/G
3793	Male	26	1	G/A	G/C	G/G
4106	Female	26	1	G/A	G/C	G/G
10115	Male	31	1	A/A	G/G	G/G
10321	Male	35	1	A/A	G/G	G/G
10552	Male	35	1	A/A	G/C	G/G
C185	Male	15	1	A/A	G/C	G/G
C767	Male	21	1	A/A	G/G	G/G
10102	Female	32	1	A/A	G/G	G/G
40015	Male	25	1	NA	G/G	G/G
125	Female	41	1	A/A	G/C	G/G
165	Female	46	1	A/A	G/C	G/G
253	Male	32	1	A/A	G/G	G/G
257	Male	20	1	G/A	G/C	G/G
269	Female	33	1	A/A	G/C	G/G
317	Female	24	1	A/A	G/C	G/G
536	Female	24	1	A/A	G/G	G/G
587	Female	46	1	A/A	G/C	G/G
625	Male	47	1	A/A	C/C	G/G
638	Male	46	1	A/A	G/G	G/G
936	Male	47	1	A/A	G/G	G/G
978	Female	46	1	A/A	G/G	G/G
1010	Male	22	1	A/A	G/C	G/G
1936	Female	48	1	A/A	G/G	G/G
1957	Male	32	1	A/A	C/C	G/G
1968	Male	18	1	A/A	G/G	G/G
1994	Female	29	1	A/A	G/G	G/G
3498	Female	44	1	A/A	C/C	G/G
10002	Male	46	1	A/A	G/G	G/G
10654	Male	43	1	NA	G/C	G/G
10715	Female	46	1	A/A	G/C	G/G
10816	Male	30	1	A/A	G/C	G/G
10871	Male	34	1	G/A	G/C	G/G
11021	Male	36	1	A/A	C/C	G/G
40019	Female	30	1	A/A	G/G	G/G
C178	Male	39	1	NA	NA	G/G
C252	Male	33	1	A/A	G/C	G/G
C289	Female	31	1	A/A	G/C	G/G
C291	Female	54	1	A/A	G/C	G/G
C701	Male	49	1	A/A	G/G	G/G
10826	Male	35	1	A/A	G/G	G/G
11039	Male	16	1	A/A	G/C	G/G
474	Female	28	1	A/A	G/C	G/G
3457	Female	48	1	A/A	C/C	G/G
179	Male	48	1	A/A	C/C	G/G
11357	Female	47	1	G/A	G/G	G/G
40119	Male	17	1	A/A	G/G	G/G
394	Female	25	1	A/A	G/C	G/G
10184	Male	41	1	A/A	G/G	G/G
10317	Male	61	1	A/A	G/G	G/G
10944	Male	31	1	A/A	C/C	G/G
11007	Male	30	1	A/A	G/G	G/G
11424	Male	47	1	A/A	G/C	G/G
11579	Female	45	1	A/A	C/C	G/G
C1153	Male	34	1	A/A	G/C	G/G
T18	Male	19	1	A/A	C/C	G/G
171	Female	56	1	G/G	G/G	G/A
840	Male	14	1	NA	G/C	A/A
2321	Male	20	1	G/G	G/G	G/A
10074	Male	37	1	G/G	G/G	G/G
10097	Male	62	1	G/G	G/G	A/A
10101	Female	14	1	G/G	G/C	G/A
10845	Male	26	1	G/G	G/G	G/G
10975	Female	46	1	NA	G/G	G/A
11002	Male	33	1	G/G	G/G	G/A
11080	Male	75	1	G/G	G/G	G/A
11300	Male	22	1	G/G	G/C	G/A
11365	Male	21	1	G/G	G/C	G/G
11524	Male	25	1	G/G	G/G	G/A
C1216	Male	30	1	G/G	G/G	G/G
T17	Female	35	1	G/G	G/G	G/A
T9	Male	54	1	NA	G/G	G/G
10356	Male	46	1	G/G	G/G	G/A
Z4	Female	39	1	G/G	G/C	G/G
75	Male	26	1	NA	G/G	G/G
180	Male	40	1	G/G	G/G	G/G
208	Male	28	1	G/G	G/G	G/G
515	Female	30	1	G/G	G/G	G/A
573	Female	58	1	G/G	G/C	G/A
628	Female	27	1	G/G	G/G	G/A
629	Male	81	1	G/G	G/G	G/G
1280	Male	49	1	G/G	G/C	G/G
2244	Female	19	1	G/G	G/G	G/G
2353	Male	41	1	G/G	G/G	G/G
10054	Female	27	1	G/G	G/G	G/G
10157	Male	21	1	G/G	G/G	G/G
10171	Female	28	1	G/G	G/G	G/A
10379	Male	34	1	G/G	G/G	G/G
10380	Female	28	1	G/G	G/G	G/A
10467	Male	35	1	G/G	G/C	G/G
10525	Male	21	1	G/G	G/G	G/G
10916	Male	38	1	G/G	G/C	G/G
10949	Female	24	1	G/G	G/G	G/G
11280	Female	42	1	G/G	G/G	G/A
11307	Female	49	1	G/G	G/C	G/G
11392	Male	67	1	G/G	G/C	G/G
11596	Male	70	1	G/G	G/G	G/G
C225	Female	22	1	G/G	G/G	G/A
C241	Female	30	1	G/G	G/G	G/A
1607	Female	20	1	G/G	G/C	G/G
1513	Male	50	1	G/G	G/G	G/G
1275	Female	19	1	G/G	G/G	G/G
11251	Male	57	1	G/G	G/G	G/G
143	Male	35	1	G/G	G/G	G/G
603	Male	26	1	G/G	G/G	G/G
951	Female	37	1	G/G	G/G	G/A
1242	Male	25	1	G/G	G/G	G/G
1278	Male	42	1	NA	G/C	G/G
3541	Male	35	1	G/G	G/G	G/A
3674	Female	32	1	G/G	G/G	G/A
4103	Female	26	1	G/G	G/G	G/A
10907	Male	28	1	G/G	G/C	G/G
11456	Male	34	1	G/A	G/C	G/G
11796	Male	45	1	G/G	G/G	G/G
C947	Female	22	1	G/G	G/G	G/G
10863	Male	40	1	G/G	G/G	G/A
190	Male	29	1	G/G	G/G	G/G
30029	Female	53	1	G/G	G/G	G/G
C272	Male	39	1	G/G	G/G	G/G
11068	Female	22	1	G/G	G/G	G/G
11372	Female	42	1	G/G	G/C	G/A
C284	Female	24	1	G/G	G/C	A/A
C391	Male	68	1	G/G	G/G	G/G
T15	Male	45	1	G/G	G/G	G/G
10592	Male	67	1	G/G	G/G	G/A
415	Male	37	1	G/G	G/C	G/G
558	Female	38	1	G/G	G/G	G/A
940	Male	51	1	G/G	G/G	G/G
1092	Male	24	1	G/G	G/C	G/G
1706	Male	23	1	G/A	G/G	G/A
2319	Female	33	1	G/G	G/G	G/G
2347	Female	14	1	G/G	G/G	G/A
10345	Male	20	1	G/G	G/C	G/G
10550	Female	18	1	G/G	G/G	G/A
10721	Male	20	1	G/G	G/G	G/G
10735	Male	30	1	G/G	G/C	G/A
10802	Female	26	1	G/G	G/G	G/G
11104	Male	49	1	G/G	G/G	G/G
11306	Female	59	1	G/G	G/C	G/A
11420	Female	28	1	G/G	G/G	G/G
11458	Female	26	1	G/G	G/G	G/G
11486	Male	31	1	G/G	G/G	G/A
11525	Male	21	1	G/G	G/G	G/G
11727	Male	25	1	G/G	G/G	G/A
11794	Male	21	1	G/G	G/G	G/G
40006	Female	35	1	G/G	G/G	G/G
40094	Female	29	1	G/G	G/G	G/G
40105	Female	32	1	G/G	G/G	G/G
40125	Male	39	1	G/G	G/G	G/A
40144	Male	23	1	G/G	G/G	G/G
C1110	Female	22	1	G/G	G/G	G/A
C1561	Male	56	1	G/G	G/G	G/G
C239	Male	21	1	G/G	G/C	G/G
C247	Female	17	1	G/G	G/G	G/G
C267	Female	28	1	G/G	G/G	G/A
C346	Female	36	1	G/G	G/G	G/G
C658	Male	23	1	G/G	G/G	G/A
T10	Male	40	1	G/G	G/C	G/G
Z2	Male	17	1	G/G	G/C	G/A
792	Female	22	1	G/G	G/G	G/G
870	Male	47	1	G/G	G/G	G/G
11519	Male	69	1	G/G	G/G	G/G
167	Female	12	1	G/G	G/G	G/A
513	Female	26	1	G/G	G/G	G/G
550	Male	46	1	G/G	G/G	G/A
1274	Female	20	1	G/G	G/G	G/A
1800	Female	33	1	G/G	G/C	G/A
2924	Female	33	1	G/G	G/C	G/G
3430	Male	27	1	G/G	G/G	G/A
4036	Male	44	1	G/G	G/G	G/G
10510	Male	25	1	G/G	G/G	G/A
10586	Female	46	1	G/G	G/G	G/A
10624	Male	26	1	G/G	G/C	G/G
10807	Male	17	1	G/G	G/G	G/A
10857	Male	45	1	G/G	G/G	G/G
10915	Male	45	1	G/G	G/G	G/A
11009	Male	29	1	G/G	G/G	G/A
11071	Male	24	1	G/G	G/C	G/A
11079	Male	36	1	G/G	G/G	G/G
11296	Female	52	1	G/G	G/C	G/A
11731	Female	51	1	G/G	G/G	G/G
C503	Male	25	1	G/G	G/G	G/A
10997	Male	28	1	G/G	G/G	G/A
40129	Male	26	1	NA	G/G	G/A
C1169	Male	38	1	G/G	G/G	G/G
159	Female	16	1	G/A	G/G	G/G
1238	Male	30	1	G/G	G/G	G/G
40097	Male	45	1	G/G	G/G	G/G
Z16	Male	47	1	G/G	G/G	G/A
130	Male	17	1	G/G	G/G	G/A
170	Female	40	1	G/G	G/G	G/G
172	Male	28	1	G/G	G/G	G/A
212	Female	46	1	G/G	G/G	G/G
279	Female	46	1	G/G	G/G	G/G
511	Male	19	1	G/G	G/G	G/G
514	Female	19	1	G/G	G/C	A/A
535	Male	17	1	G/A	C/C	G/G
644	Female	28	1	NA	G/C	G/G
827	Male	18	1	NA	G/G	G/A
1005	Female	23	1	NA	G/C	G/G
1088	Female	30	1	NA	G/G	G/G
1610	Female	34	1	G/A	G/C	G/G
2156	Male	55	1	G/A	G/C	G/A
2503	Male	43	1	G/A	G/G	G/G
3478	Female	55	1	NA	G/G	G/G
3687	Female	40	1	G/A	G/C	G/G
10059	Female	30	1	NA	G/C	G/G
10287	Male	39	1	G/A	G/C	G/A
10350	Male	25	1	G/A	G/G	G/G
10391	Male	17	1	G/A	G/G	G/A
10459	Male	28	1	G/A	G/G	G/G
10697	Male	28	1	G/A	G/C	G/G
10753	Female	43	1	G/A	G/C	G/G
10842	Female	37	1	G/A	G/C	G/G
10894	Male	30	1	G/A	G/C	G/G
10963	Female	36	1	G/A	C/C	G/G
10996	Male	40	1	G/A	G/G	G/G
11065	Male	20	1	G/A	G/C	G/G
11069	Male	23	1	A/A	G/G	G/G
11289	Male	25	1	G/A	G/G	G/G
11297	Male	31	1	G/A	G/C	G/A
11354	Male	20	1	G/A	G/G	G/G
11629	Male	26	1	G/A	G/C	G/G
30021	Male	22	1	G/A	G/G	G/G
40112	Male	23	1	G/A	G/C	G/G
40197	Male	27	1	NA	G/C	G/A
C1181	Male	38	1	G/A	G/G	G/G
C207	Male	34	1	G/A	G/C	G/G
C244	Female	32	1	G/A	G/C	G/G
C480	Male	25	1	G/A	G/G	G/G
C657	Male	20	1	G/A	G/C	G/G
T19	Male	40	1	G/A	G/G	G/G
Z6	Male	28	1	G/G	G/G	G/G
4112	Male	40	1	G/A	C/C	G/G
10085	Male	50	1	G/A	G/C	G/G
30026	Female	19	1	G/A	G/C	G/A
C271	Male	27	1	G/A	G/C	G/A
238	Male	19	1	NA	G/C	G/A
3571	Male	48	1	G/A	G/C	G/G
30025	Female	56	1	NA	G/G	A/A
C235	Female	55	1	NA	G/C	G/G
10943	Male	22	1	G/A	G/C	G/G
11093	Male	26	1	G/A	G/C	G/G
T1	Female	39	1	G/A	G/G	G/G
2023	Female	18	1	NA	G/C	G/A
10551	Female	38	1	G/G	G/G	G/G
10858	Female	25	1	NA	G/G	G/G
C467	Female	42	1	G/A	G/C	G/G
3902	Female	39	1	NA	G/C	G/G
4009	Male	38	1	G/A	G/G	G/G
11279	Male	25	1	G/A	G/C	G/A
C202	Male	21	1	G/A	G/G	G/G
C342	Male	34	1	G/A	G/C	G/G
266	Female	25	1	G/A	G/C	G/A
4121	Male	28	1	G/A	G/G	G/A
10574	Male	37	1	G/A	G/C	G/G
10667	Female	39	1	NA	G/C	G/A
10819	Male	22	1	NA	G/C	G/G
11062	Male	45	1	G/A	G/C	G/G
11626	Male	20	1	NA	G/C	G/G
40126	Female	46	1	NA	G/G	G/G
3070	Male	22	1	G/A	G/C	G/G
10745	Male	25	1	G/A	NA	G/G
C691	Male	66	1	G/A	G/C	G/G
C720	Female	48	1	G/A	G/C	G/G
40195	Female	21	1	G/A	G/C	G/G
291	Male	22	1	G/A	G/G	G/G
2248	Male	20	1	G/A	C/C	G/G
3877	Male	21	1	G/A	G/G	G/G
10535	Male	33	1	G/A	G/G	G/G
10811	Male	18	1	G/A	NA	G/G
2372	Female	21	1	G/A	G/G	G/G
635	Male	43	1	G/A	G/C	G/G
1113	Male	44	1	G/A	G/G	G/G
726	Male	18	1	G/G	G/C	G/G
818	Male	52	1	G/A	G/C	G/G
831	Female	55	1	G/A	G/G	G/A
897	Female	37	1	G/A	G/C	G/G
915	Female	23	1	G/A	G/C	G/G
1103	Male	28	1	G/A	G/G	G/G
1155	Male	47	1	G/A	G/G	G/G
650	Male	26	1	G/A	G/C	G/G
682	Male	26	1	G/A	G/G	G/G
739	Female	32	1	G/A	G/G	G/G
744	Female	22	1	G/A	G/G	G/A
748	Male	20	1	G/A	G/C	G/G
900	Female	38	1	G/A	C/C	G/G
1020	Male	21	1	G/A	G/G	G/G
11266	Male	35	1	NA	NA	G/G
369	Male	30	1	G/A	G/G	G/G
802	Female	55	1	G/A	G/G	G/A
903	Male	46	1	G/A	G/G	G/A
913	Female	16	1	G/A	G/G	G/G
430	Female	25	1	G/A	G/G	G/G
761	Male	33	1	G/G	G/C	G/A
795	Female	17	1	G/A	G/G	G/G
1079	Female	32	1	G/A	G/C	G/G
308	Female	45	1	G/A	G/C	G/G
25	Female	29	1	G/A	G/G	G/G
362	Male	45	1	G/A	G/C	G/G
466	Male	35	1	G/A	G/C	G/G
683	Male	19	1	G/A	G/C	G/G
880	Male	41	1	G/A	G/C	G/G
960	Female	18	1	G/A	G/C	G/G
351	Female	64	1	G/A	G/C	G/A
663	Male	32	1	G/A	G/G	G/A
877	Female	22	1	G/A	G/G	G/G
383	Female	37	1	G/A	G/G	G/G
424	Male	24	1	G/A	G/C	G/G
10196	Male	20	1	G/A	G/C	G/G
717	Male	24	1	G/A	G/G	G/A
414	Female	55	1	G/A	G/G	G/G
30007	Female	25	1	G/A	G/G	G/G
489	Female	36	1	G/A	G/G	G/G
494	Male	26	1	NA	G/C	G/G
838	Female	26	1	G/G	G/C	G/G
939	Female	31	1	G/A	G/C	G/G
204	Male	23	1	G/A	G/G	G/G
16	Male	50	1	G/A	G/G	G/G
267	Female	32	1	G/A	G/G	G/G
1027	Male	31	1	G/A	G/C	G/G
30001	Male	35	1	G/A	G/C	G/G
584	Male	44	1	G/A	G/G	G/G
290	Male	46	1	NA	G/G	G/G
541	Female	37	1	G/A	G/G	G/G
581	Male	23	1	G/A	G/G	G/G
589	Female	54	1	G/A	G/G	G/G
956	Male	40	1	G/A	G/C	G/A
601	Female	37	1	G/A	G/G	G/G
479	Male	35	1	G/A	G/C	G/G
630	Male	27	1	G/A	G/C	G/G
593	Female	21	1	G/G	G/G	G/A
2010	Male	34	1	G/A	G/C	G/G
4031	Female	41	1	G/A	C/C	G/G
40035	Male	38	1	G/A	G/G	G/G
C216	Male	24	1	G/A	G/C	G/A
357	Male	33	1	G/A	G/G	G/A
503	Male	36	1	G/A	G/G	G/G
504	Female	29	1	G/G	G/G	G/G
304	Male	29	1	G/A	G/C	G/G
299	Female	47	1	G/A	G/G	G/G
312	Female	28	1	G/A	G/C	G/G
1588	Male	26	1	G/A	G/G	G/G
C684	Female	45	1	G/A	G/C	G/G
112	Male	46	1	G/A	G/C	G/G
786	Female	24	1	G/A	G/C	G/G
1218	Female	52	1	NA	G/C	G/G
1519	Female	46	1	G/A	G/G	G/G
3816	Male	44	1	G/A	G/C	G/G
10181	Male	57	1	G/A	G/C	G/A
11299	Female	24	1	G/A	C/C	G/G
30023	Male	31	1	G/A	G/G	G/G
40016	Female	41	1	G/A	C/C	G/G
680	Male	35	1	NA	G/G	G/G
2091	Female	45	1	G/A	G/G	G/G
10057	Male	36	1	G/A	G/C	G/G
10310	Male	27	1	G/A	G/C	G/G
10457	Female	23	1	G/A	G/G	G/G
181	Male	39	1	G/A	G/C	G/G
343	Male	19	1	G/A	G/G	G/G
631	Male	19	1	G/A	G/G	G/A
182	Female	23	1	G/A	G/C	G/G
283	Female	25	1	G/A	C/C	G/G
311	Female	39	1	G/A	C/C	G/A
564	Male	20	1	G/A	G/C	G/G
605	Male	35	1	G/A	G/G	G/G
686	Male	28	1	G/G	G/C	G/G
715	Male	41	1	G/A	G/G	G/G
961	Male	33	1	G/A	G/C	G/A
1213	Male	39	1	G/A	G/G	G/G
2629	Male	30	1	G/A	G/G	G/G
2978	Female	15	1	G/A	G/G	G/G
3565	Female	57	1	G/A	G/C	G/A
3849	Male	42	1	G/A	G/C	G/A
10179	Female	37	1	G/A	G/C	G/A
C870	Female	30	1	G/A	G/C	G/G
219	Female	24	1	G/A	G/C	G/G
284	Female	52	1	G/A	G/C	G/A
333	Male	27	1	G/A	G/C	G/G
452	Male	29	1	G/A	G/G	G/A
473	Female	50	1	G/A	G/G	G/G
520	Female	47	1	G/A	G/C	G/G
569	Female	45	1	G/A	G/C	G/G
632	Female	47	1	G/A	G/C	G/A
759	Female	45	1	G/A	G/G	G/G
874	Male	46	1	G/A	G/G	G/G
81	Male	46	1	G/A	G/C	G/G
114	Male	46	1	G/A	G/C	G/G
134	Male	52	1	G/G	C/C	G/G
155	Female	48	1	NA	G/G	G/A
599	Female	45	1	G/A	G/C	G/G
837	Female	15	1	G/A	G/G	G/G
1208	Male	25	1	G/A	G/C	G/G
1228	Male	23	1	G/A	C/C	G/G
3684	Female	41	1	G/A	G/C	G/A
3810	Male	17	1	NA	G/G	NA
10650	Male	45	1	G/A	G/G	G/G
10794	Male	34	1	G/A	G/G	G/G
C1010	Female	53	1	G/A	G/C	G/G
566	Male	35	1	G/A	G/C	G/G
225	Male	34	1	G/A	G/C	G/G
469	Female	55	1	G/A	G/C	G/G
477	Male	20	1	G/A	G/C	G/G
585	Male	52	1	G/A	G/G	G/G
622	Male	24	1	G/A	G/C	G/G
770	Female	26	1	G/A	G/G	G/G
1075	Male	46	1	G/A	G/G	G/A
1338	Female	37	1	G/A	G/G	G/G
10322	Female	48	1	G/A	G/C	G/G
10344	Female	33	1	G/A	G/C	G/G
10442	Female	24	1	G/A	G/C	G/G
10479	Female	32	1	G/A	G/G	G/A
10980	Female	16	1	G/A	G/C	G/A
11301	Male	28	1	G/A	G/C	G/G
11595	Male	22	1	G/A	G/C	G/G
40130	Male	24	1	G/A	G/G	G/G
C1184	Female	24	1	G/A	G/G	G/G
C1186	Female	43	1	G/A	G/C	G/G
C590	Male	52	1	G/A	G/G	G/A
C707	Female	35	1	G/A	G/C	G/G
C913	Male	18	1	G/A	G/C	G/G
Z1	Male	26	1	G/A	G/C	G/G
433	Male	26	1	G/A	G/C	G/G
2406	Female	31	1	G/A	G/G	G/A
3605	Male	49	1	G/A	G/G	G/G
C1083	Female	26	1	G/A	G/G	G/G
1534	Male	47	1	G/A	G/C	G/G
10212	Male	45	1	G/A	G/G	G/G
10292	Male	48	1	G/A	G/C	G/G
10575	Male	23	1	G/A	G/C	G/G
532	Male	50	1	G/A	G/C	G/A
10984	Female	45	1	G/A	G/G	G/G
446	Female	45	1	G/A	G/C	G/G
2090	Male	28	1	G/A	G/C	G/G
11331	Female	34	1	G/A	G/G	G/G
40017	Female	60	1	NA	G/C	G/A
554	Female	27	1	G/A	G/C	G/A
11247	Female	18	1	G/A	G/C	G/G
453	Female	31	1	G/A	G/C	G/G
598	Male	37	1	G/A	G/G	G/G
964	Male	26	1	G/A	G/G	G/G
2216	Male	22	1	G/A	G/C	G/G
2282	Female	46	1	G/A	G/G	G/G
2332	Female	47	1	G/A	G/C	G/A
2542	Male	21	1	G/A	G/G	G/G
10466	Male	47	1	G/A	G/C	G/G
10538	Female	47	1	G/A	G/G	G/G
10557	Female	46	1	G/A	G/C	G/G
10820	Male	47	1	G/A	G/C	G/A
C234	Female	21	1	G/G	G/G	G/A
C243	Male	25	1	G/A	G/C	G/G
C41	Female	30	1	G/A	C/C	G/G
C588	Female	47	1	G/A	C/C	G/A
175	Male	22	1	G/A	G/G	G/A
3442	Male	24	1	G/A	G/C	G/A
10303	Female	23	1	G/A	G/G	G/G
10506	Female	54	1	G/A	G/G	G/G
11073	Male	19	1	G/A	G/G	G/G
11364	Male	27	1	G/A	G/C	G/G
C636	Female	45	1	G/A	G/C	G/G
2926	Female	43	1	G/A	G/G	G/G
3499	Female	29	1	G/A	G/C	G/G
10825	Male	51	1	G/A	G/G	G/A
11391	Male	46	1	G/A	G/C	G/G
T3	Female	45	1	G/A	G/C	G/G
10035	Male	47	1	G/A	G/C	G/A
C613	Female	48	1	G/A	G/C	G/G
3661	Female	45	1	G/A	G/G	G/G
4015	Male	30	1	G/A	G/G	G/G
10017	Male	49	1	G/A	G/G	G/G
10643	Female	47	1	G/A	G/G	G/G
10761	Male	35	1	G/A	G/G	G/A
10840	Female	31	1	G/A	G/C	G/A
10979	Female	33	1	G/A	G/G	G/G
11005	Male	41	1	G/A	G/G	G/G
11059	Male	50	1	G/A	G/G	G/G
11273	Male	26	1	G/A	G/C	G/A
11295	Female	39	1	G/A	G/G	G/G
30028	Male	16	1	G/A	G/C	G/G
C359	Male	28	1	G/A	G/C	G/G
C668	Male	37	1	NA	G/G	G/A
T11	Male	31	1	G/A	G/C	G/G
917	Male	34	1	G/A	G/C	G/A
3566	Male	25	1	G/A	G/G	G/G
3621	Male	25	1	G/A	G/G	G/G
10128	Female	23	1	G/A	G/G	G/G
10527	Male	38	1	G/A	G/C	G/G
10631	Female	56	1	G/A	NA	G/G
10637	Female	19	1	G/A	G/C	G/A
10742	Female	48	1	G/A	G/G	G/G
10810	Male	40	1	G/A	G/C	G/G
10969	Female	55	1	G/A	G/C	G/A
11064	Female	32	1	G/A	G/C	G/G
11346	Female	47	1	G/A	G/G	G/G
11351	Male	46	1	G/A	G/C	G/G
11388	Male	47	1	G/A	G/G	G/G
11798	Male	28	1	G/A	G/C	G/G
40012	Male	21	1	G/A	G/C	G/G
C315	Female	18	1	G/A	G/G	G/G
11000	Female	46	1	G/A	G/C	G/G
525	Female	34	1	G/A	G/C	G/G
10152	Male	23	1	G/A	G/C	G/G
11303	Male	37	1	G/A	G/G	G/G
183	Female	34	1	A/A	G/C	G/G
187	Male	31	1	G/A	G/C	G/G
273	Male	46	1	G/A	G/G	G/G
309	Female	47	1	G/A	G/C	G/G
316	Female	48	1	G/A	G/C	G/G
509	Female	32	1	G/A	G/C	G/A
510	Male	47	1	G/G	G/G	G/G
512	Male	46	1	G/A	G/G	G/G
540	Female	21	1	NA	G/G	NA
563	Male	32	1	NA	G/G	NA
988	Male	28	1	NA	NA	NA
1232	Male	25	1	NA	G/C	NA
1315	Male	57	1	NA	NA	NA
3019	Female	51	1	NA	G/G	NA
3792	Male	34	1	NA	G/C	G/G
4030	Male	19	1	NA	G/C	G/G
4088	Male	36	1	NA	C/C	G/G
10071	Female	61	1	NA	NA	NA
10195	Female	36	1	NA	NA	NA
10202	Female	61	1	NA	G/C	G/G
10352	Male	30	1	NA	NA	NA
10524	Female	39	1	NA	C/C	G/G
10526	Female	46	1	NA	NA	NA
10542	Female	16	1	NA	G/G	NA
10583	Female	36	1	NA	G/C	G/G
10606	Female	42	1	NA	G/C	NA
10613	Female	39	1	NA	C/C	NA
10619	Female	56	1	NA	NA	NA
10728	Female	16	1	NA	G/G	NA
10910	Female	41	1	NA	G/G	NA
11074	Female	22	1	NA	G/G	NA
11084	Female	31	1	NA	NA	NA
11302	Female	17	1	NA	G/G	NA
11551	Female	37	1	NA	G/G	NA
40127	Female	52	1	NA	C/C	NA
40132	Female	49	1	NA	NA	NA
C1070	Female	42	1	NA	NA	NA
C1121	Male	44	1	NA	G/C	G/G
C231	Male	52	1	NA	G/G	NA
C249	Male	33	1	A/A	C/C	G/G
C432	Male	80	1	NA	G/C	G/G
C629	Male	32	1	NA	G/C	G/G
T8	Female	36	1	NA	G/C	G/G
3988	Female	18	1	NA	C/C	NA
10850	Female	32	1	NA	G/G	G/G
306	Male	24	1	NA	NA	NA
10415	Female	29	1	NA	G/C	NA
10522	Male	36	1	NA	G/C	G/G
10873	Male	54	1	A/A	G/G	G/G
11076	Female	41	1	A/A	C/C	G/G
10930	Male	30	1	NA	G/C	G/G
10012	Male	50	1	G/A	G/G	G/G
10383	Female	18	1	G/G	G/C	G/G
10532	Male	42	1	NA	C/C	G/G
C69	Male	19	1	G/G	G/G	G/G
11067	Female	14	1	NA	G/G	G/A
399	Female	51	1	NA	G/C	G/G
2129	Female	24	1	A/A	G/G	G/G
10070	Male	25	1	G/A	G/C	G/G
11041	Female	27	1	G/G	G/C	G/G
40145	Female	28	1	A/A	G/C	G/G
1235	Male	20	1	G/G	G/G	A/A
10210	Male	21	1	A/A	G/C	NA
40018	Male	19	1	G/A	G/C	G/G
567	Female	21	1	NA	C/C	G/G
2168	Male	29	0	A/A	G/C	G/G
10359	Male	26	0	A/A	G/C	G/G
11400	Male	39	0	A/A	G/G	G/G
21	Female	21	0	A/A	C/C	G/G
1273	Male	43	0	A/A	G/C	G/G
10090	Female	32	0	A/A	C/C	G/G
10174	Female	32	0	A/A	G/C	G/G
11241	Male	29	0	A/A	G/C	G/G
11336	Male	40	0	G/A	C/C	G/G
24	Male	29	0	A/A	G/G	G/G
55	Male	38	0	A/A	G/G	G/G
184	Male	31	0	A/A	G/C	G/G
189	Male	28	0	A/A	C/C	G/G
261	Female	32	0	A/A	G/C	G/G
791	Male	38	0	A/A	C/C	G/G
833	Male	22	0	A/A	G/G	G/G
842	Female	35	0	A/A	C/C	G/G
1069	Male	29	0	A/A	G/C	G/G
1130	Male	33	0	A/A	C/C	G/G
1136	Female	26	0	A/A	G/C	G/G
10041	Female	35	0	A/A	C/C	G/G
366	Female	44	0	A/A	G/C	G/G
367	Female	18	0	A/A	G/C	G/G
375	Male	45	0	A/A	G/G	G/G
380	Male	30	0	A/A	C/C	G/G
389	Female	51	0	A/A	G/C	G/G
545	Female	47	0	A/A	G/C	G/G
617	Male	26	0	A/A	G/C	G/G
646	Female	34	0	A/A	G/G	G/G
647	Male	24	0	G/A	G/C	G/G
652	Male	35	0	A/A	G/C	G/G
655	Female	32	0	A/A	G/C	G/G
656	Male	54	0	A/A	G/C	G/G
657	Female	27	0	A/A	C/C	G/G
660	Male	38	0	A/A	G/C	G/G
661	Male	28	0	A/A	G/C	G/G
662	Female	29	0	A/A	G/C	G/G
725	Female	53	0	A/A	G/G	G/G
727	Female	27	0	A/A	G/C	G/G
730	Female	34	0	A/A	C/C	G/G
732	Male	29	0	G/A	G/C	G/G
737	Female	25	0	A/A	G/G	G/G
756	Male	32	0	A/A	C/C	G/G
764	Female	34	0	A/A	C/C	G/G
782	Male	52	0	A/A	G/C	G/G
822	Male	48	0	A/A	C/C	G/G
830	Female	43	0	A/A	G/C	G/G
892	Female	31	0	A/A	G/C	G/G
906	Female	36	0	A/A	G/G	G/G
908	Female	20	0	A/A	G/G	G/G
910	Male	32	0	A/A	G/C	G/G
923	Female	58	0	A/A	G/C	G/G
969	Female	42	0	A/A	G/C	G/G
1070	Female	19	0	A/A	C/C	G/G
1080	Female	24	0	A/A	G/G	G/G
1099	Male	33	0	A/A	G/C	G/G
1101	Male	21	0	A/A	C/C	G/G
1102	Male	39	0	A/A	G/C	G/G
1156	Female	32	0	A/A	G/C	G/G
1159	Female	58	0	G/A	C/C	G/G
1165	Male	25	0	A/A	G/C	G/G
1170	Male	31	0	A/A	G/G	G/G
221	Female	30	0	A/A	G/G	G/G
649	Male	29	0	A/A	G/G	G/G
651	Male	28	0	A/A	G/G	G/G
658	Male	22	0	A/A	G/C	G/G
673	Female	22	0	A/A	G/G	G/G
693	Male	25	0	A/A	C/C	G/G
753	Male	52	0	A/A	G/C	G/G
847	Female	28	0	A/A	G/C	G/G
1134	Male	29	0	A/A	G/G	G/G
1147	Female	60	0	A/A	G/G	G/G
10159	Female	25	0	A/A	G/C	G/G
678	Male	28	0	G/A	G/G	G/G
755	Female	51	0	A/A	C/C	G/G
1127	Female	42	0	A/A	C/C	G/G
360	Female	75	0	A/A	G/C	G/G
437	Female	29	0	A/A	G/C	G/G
740	Male	34	0	A/A	G/G	G/G
329	Female	51	0	A/A	G/G	G/G
493	Male	25	0	A/A	G/C	G/G
919	Male	30	0	A/A	G/C	G/G
363	Female	24	0	A/A	G/G	G/G
376	Male	18	0	A/A	G/G	G/G
382	Female	34	0	A/A	G/G	G/G
425	Male	36	0	A/A	C/C	G/G
763	Male	31	0	A/A	C/C	G/G
769	Male	25	0	A/A	G/C	G/G
771	Male	44	0	A/A	G/C	G/G
909	Female	32	0	A/A	C/C	G/G
967	Male	51	0	A/A	C/C	G/G
1137	Male	33	0	A/A	G/C	G/G
220	Female	50	0	A/A	G/G	G/G
10083	Male	48	0	A/A	G/C	G/G
472	Male	53	0	A/A	G/G	G/G
893	Female	25	0	G/A	C/C	G/G
365	Male	32	0	A/A	G/C	G/G
449	Male	51	0	A/A	G/C	G/G
780	Female	62	0	A/A	G/C	G/G
324	Male	57	0	A/A	G/C	G/G
462	Female	18	0	A/A	C/C	G/G
962	Male	24	0	A/A	G/C	G/G
345	Female	35	0	A/A	C/C	G/G
392	Male	40	0	A/A	G/C	G/G
426	Female	37	0	A/A	G/C	G/G
751	Female	32	0	A/A	C/C	G/G
467	Female	27	0	A/A	G/C	G/G
924	Male	39	0	A/A	C/C	G/G
352	Female	26	0	A/A	G/G	G/G
101	Male	48	0	A/A	G/G	G/G
508	Male	47	0	A/A	G/C	G/G
495	Female	22	0	A/A	C/C	G/G
210	Female	51	0	A/A	G/G	G/G
323	Male	36	0	A/A	C/C	G/G
334	Male	41	0	A/A	G/C	G/G
390	Female	28	0	A/A	G/C	G/G
391	Female	31	0	A/A	G/C	G/G
408	Female	52	0	A/A	C/C	G/G
417	Female	22	0	A/A	G/C	G/G
468	Male	41	0	A/A	G/G	G/G
534	Female	23	0	A/A	C/C	G/G
776	Male	25	0	A/A	G/C	G/G
859	Male	34	0	A/A	G/C	G/G
865	Male	37	0	A/A	G/C	G/G
894	Female	22	0	A/A	C/C	G/G
10127	Male	38	0	A/A	G/G	G/G
501	Male	39	0	A/A	C/C	G/G
760	Male	39	0	A/A	G/C	G/G
3173	Female	41	0	A/A	G/C	G/G
461	Female	39	0	A/A	G/G	G/G
868	Female	42	0	A/A	C/C	G/G
1086	Male	47	0	A/A	G/C	G/G
577	Female	40	0	A/A	G/C	G/G
471	Female	38	0	A/A	G/G	G/G
488	Female	48	0	A/A	G/C	G/G
278	Male	17	0	A/A	G/C	G/G
443	Male	37	0	A/A	G/C	G/G
475	Male	54	0	A/A	G/C	G/G
741	Male	58	0	A/A	G/G	G/G
30024	Male	69	0	A/A	G/C	G/G
237	Male	47	0	A/A	G/C	G/G
281	Male	36	0	A/A	G/G	G/G
326	Male	24	0	A/A	C/C	G/G
396	Female	47	0	A/A	G/C	G/G
402	Male	21	0	A/A	C/C	G/G
407	Female	21	0	A/A	G/C	G/G
476	Female	35	0	A/A	G/C	G/G
500	Male	34	0	A/A	G/C	G/G
591	Male	20	0	A/A	C/C	G/G
T6	Male	18	0	A/A	G/C	G/G
271	Male	30	0	A/A	C/C	G/G
3324	Female	34	0	A/A	G/G	G/G
Z23	Male	50	0	A/A	G/G	G/G
330	Male	28	0	A/A	G/C	G/G
404	Male	28	0	A/A	C/C	G/G
521	Female	26	0	A/A	G/C	G/G
839	Male	54	0	A/A	C/C	G/G
977	Female	21	0	A/A	G/C	G/G
3335	Female	60	0	A/A	G/C	G/G
3972	Female	54	0	A/A	C/C	G/G
30006	Female	34	0	A/A	G/G	G/G
30013	Male	53	0	A/A	G/G	G/G
40143	Female	41	0	A/A	G/G	G/G
C280	Male	25	0	A/A	G/G	G/G
319	Male	43	0	A/A	G/C	G/G
395	Female	25	0	A/A	G/G	G/G
478	Male	24	0	A/A	C/C	G/G
10878	Female	28	0	G/A	G/C	G/G
40009	Male	21	0	A/A	G/C	G/G
56	Female	31	0	A/A	G/C	G/G
76	Female	35	0	A/A	G/G	G/G
2081	Female	34	0	A/A	C/C	G/G
3428	Male	54	0	A/A	C/C	G/G
3471	Male	22	0	A/A	C/C	G/G
10475	Male	30	0	A/A	G/G	G/G
10696	Male	30	0	A/A	G/G	G/G
10942	Male	30	0	A/A	C/C	G/G
40053	Female	28	0	A/A	C/C	G/G
C862	Male	32	0	A/A	G/C	G/G
7	Female	31	0	A/A	G/G	G/G
168	Female	37	0	A/A	G/C	G/G
561	Male	29	0	A/A	G/C	G/G
637	Male	46	0	A/A	G/C	G/G
953	Female	27	0	A/A	G/C	G/G
1003	Female	45	0	A/A	C/C	G/G
1210	Male	26	0	A/A	G/G	G/G
3224	Male	36	0	A/A	G/C	G/G
3550	Male	39	0	A/A	G/C	G/G
10173	Male	53	0	A/A	G/C	G/G
10486	Female	24	0	A/A	G/C	G/G
40099	Male	51	0	A/A	C/C	G/G
C287	Male	35	0	A/A	G/C	G/G
C411	Female	26	0	A/A	C/C	G/G
C428	Female	53	0	A/A	G/C	G/G
C477	Male	19	0	A/A	C/C	G/G
T2	Female	31	0	A/A	C/C	G/G
107	Male	39	0	A/A	G/G	G/G
487	Female	51	0	A/A	G/C	G/G
516	Male	44	0	A/A	C/C	G/G
517	Female	32	0	A/A	C/C	G/G
117	Male	45	0	A/A	G/G	G/G
188	Male	53	0	A/A	G/G	G/G
614	Female	20	0	A/A	G/G	G/G
1117	Male	27	0	A/A	G/C	G/G
2814	Female	22	0	A/A	G/G	G/G
10106	Female	24	0	A/A	G/G	G/G
10268	Male	23	0	A/A	G/C	G/G
10450	Male	36	0	A/A	G/G	G/G
C1180	Female	57	0	A/A	C/C	G/G
4104	Female	52	0	A/A	G/C	G/G
10086	Female	32	0	A/A	G/C	G/G
115	Male	48	0	A/A	G/C	G/G
359	Male	26	0	A/A	G/C	G/G
403	Male	62	0	A/A	C/C	G/G
432	Male	21	0	A/A	G/C	G/G
447	Female	22	0	A/A	G/C	G/G
571	Female	32	0	A/A	G/C	G/G
575	Male	36	0	G/G	G/C	G/G
626	Male	18	0	G/G	G/G	G/G
873	Male	28	0	G/G	G/G	G/A
992	Male	41	0	G/G	G/C	G/G
218	Male	43	0	G/G	G/G	G/G
336	Male	25	0	G/G	G/G	A/A
553	Female	33	0	G/G	G/G	G/G
613	Male	36	0	G/G	G/G	G/G
943	Male	39	0	G/G	G/G	G/G
1015	Female	50	0	G/G	G/G	G/A
1078	Male	19	0	G/G	G/G	G/G
1217	Female	21	0	G/G	G/G	G/G
1222	Female	67	0	G/G	G/G	G/G
1831	Female	23	0	G/G	G/G	G/A
1921	Female	31	0	G/G	G/G	G/G
2082	Female	31	0	G/G	G/G	G/G
2913	Male	71	0	G/G	G/G	G/G
3284	Male	55	0	G/G	G/G	G/G
3575	Female	27	0	G/G	G/G	G/A
3583	Male	42	0	G/G	G/C	G/G
3950	Female	52	0	G/G	G/G	G/G
4008	Female	22	0	G/G	G/G	G/G
4086	Female	45	0	G/G	C/C	G/G
10137	Male	38	0	G/G	G/G	A/A
40031	Male	27	0	G/G	G/G	G/A
40142	Male	29	0	G/G	G/G	G/G
C1173	Female	59	0	G/G	G/G	G/G
C712	Female	23	0	G/G	G/C	G/G
C944	Female	27	0	G/G	G/G	G/A
Z5	Female	34	0	G/G	G/G	G/G
3881	Male	52	0	G/G	G/G	G/A
40060	Female	24	0	G/G	G/G	G/A
40100	Male	20	0	G/G	G/G	G/G
40109	Female	32	0	G/G	G/G	G/G
40124	Female	20	0	G/G	G/G	G/G
40131	Male	43	0	G/G	G/G	G/G
294	Female	21	0	G/G	G/G	G/G
301	Female	34	0	G/G	G/G	G/A
342	Male	38	0	G/G	G/G	G/G
348	Female	42	0	G/G	G/G	G/G
421	Female	44	0	G/G	G/G	G/G
441	Female	48	0	G/G	G/G	G/G
485	Female	42	0	G/G	G/G	G/G
496	Male	22	0	G/G	G/G	G/G
502	Male	48	0	G/G	G/G	G/G
506	Male	42	0	G/G	G/G	G/A
527	Female	33	0	G/G	G/G	G/G
559	Male	52	0	G/G	G/G	A/A
633	Male	21	0	G/G	G/G	G/G
876	Male	34	0	G/G	G/G	G/G
885	Female	21	0	G/G	G/G	G/A
1095	Male	32	0	G/G	G/G	G/G
11221	Male	70	0	G/G	G/G	A/A
C370	Male	34	0	G/G	G/G	G/G
131	Female	35	0	G/G	G/G	G/G
548	Female	58	0	G/G	G/G	G/G
670	Male	43	0	G/G	G/G	G/G
687	Male	57	0	G/G	G/C	A/A
1824	Female	26	0	G/G	C/C	G/G
2668	Female	27	0	G/G	G/G	G/G
3412	Male	28	0	G/G	G/G	G/G
3537	Male	40	0	G/G	G/G	G/G
3948	Female	23	0	G/G	G/G	G/G
10453	Male	49	0	G/G	G/G	G/G
10798	Male	48	0	G/G	G/G	A/A
10808	Male	19	0	G/G	G/G	G/A
10874	Female	39	0	G/G	G/G	G/G
11390	Male	47	0	G/G	G/G	G/A
40120	Male	33	0	G/G	G/G	G/A
C750	Male	19	0	G/G	G/C	G/G
355	Male	27	0	G/G	G/G	G/G
482	Male	36	0	G/G	G/G	G/G
17	Female	30	0	G/G	G/G	G/G
120	Male	57	0	G/G	G/G	G/G
136	Male	40	0	G/G	G/G	G/G
139	Female	23	0	G/G	G/G	G/G
144	Male	53	0	G/G	G/G	G/G
207	Male	21	0	G/G	G/G	G/G
340	Female	50	0	G/G	G/G	A/A
429	Female	57	0	G/G	G/G	G/G
544	Male	41	0	G/G	G/G	G/G
619	Male	22	0	G/G	G/G	G/G
620	Female	18	0	G/G	G/G	G/A
636	Female	52	0	G/G	G/G	G/G
875	Female	35	0	G/G	G/C	G/G
911	Male	23	0	G/G	G/G	G/G
1014	Male	22	0	G/G	G/G	G/G
1221	Female	25	0	G/G	G/G	G/G
1224	Male	31	0	G/G	G/G	G/G
1226	Male	52	0	G/G	G/G	G/A
1230	Male	36	0	G/G	C/C	G/G
2199	Female	33	0	G/G	G/C	G/G
2723	Male	42	0	G/G	G/G	G/G
2729	Male	42	0	G/G	G/G	G/A
3496	Female	22	0	G/G	G/C	G/A
3834	Male	26	0	G/G	G/G	G/G
4100	Female	19	0	G/G	G/G	G/G
4135	Female	32	0	G/G	G/G	G/A
10016	Male	30	0	G/G	G/C	G/G
10211	Female	23	0	G/G	G/G	G/A
10242	Male	32	0	G/G	G/G	G/A
10281	Male	36	0	G/G	G/G	G/G
10495	Male	40	0	G/G	G/G	G/G
10528	Male	39	0	G/G	G/G	G/G
10541	Male	33	0	G/G	G/G	G/G
10627	Male	35	0	G/G	G/G	G/G
10704	Female	29	0	G/G	G/C	G/G
10708	Male	45	0	G/G	G/G	G/G
10738	Male	24	0	G/G	G/G	G/G
11356	Male	42	0	G/G	G/G	G/G
11500	Male	33	0	G/G	G/G	G/G
40040	Male	53	0	G/G	G/G	G/G
40116	Female	49	0	G/G	G/G	G/A
40123	Female	31	0	G/G	G/C	G/G
C1175	Male	41	0	G/G	G/G	G/A
C261	Male	43	0	G/G	G/G	G/G
C262	Male	37	0	G/G	C/C	A/A
C296	Male	24	0	G/G	G/G	G/A
C699	Male	19	0	G/G	G/G	G/G
C722	Female	21	0	G/G	G/G	G/G
Z14	Male	19	0	G/G	G/G	G/G
Z3	Male	29	0	G/G	G/G	G/G
Z7	Female	34	0	G/G	G/G	G/G
518	Female	27	0	G/G	G/G	G/G
959	Male	44	0	G/G	G/G	G/G
10197	Female	24	0	G/G	G/G	G/G
40029	Male	45	0	G/G	G/G	G/A
40010	Female	34	0	G/G	G/G	G/A
526	Male	29	0	G/G	G/G	G/G
481	Male	28	0	G/G	G/G	G/A
3631	Male	27	0	G/G	G/C	G/G
4032	Female	28	0	G/G	G/C	G/G
983	Male	29	0	G/G	G/G	G/G
305	Male	45	0	G/G	G/G	G/A
1234	Female	33	0	G/G	G/G	G/G
3255	Male	39	0	G/G	G/C	G/A
10743	Male	52	0	G/G	G/C	G/A
11075	Female	43	0	G/G	G/G	G/G
11562	Female	36	0	G/G	G/G	G/A
C295	Female	32	0	G/G	G/G	G/G
2301	Female	34	0	G/G	G/C	G/G
3533	Male	33	0	G/G	G/G	G/G
10319	Female	27	0	G/G	G/G	G/G
10505	Female	32	0	G/G	G/G	G/A
10634	Male	25	0	G/G	G/C	G/G
10699	Male	44	0	G/G	G/G	G/G
10724	Male	23	0	G/G	G/G	G/A
10960	Female	22	0	G/G	G/G	G/G
11083	Male	21	0	G/G	G/G	G/A
11180	Male	19	0	G/G	G/G	G/A
11207	Male	37	0	G/G	G/G	G/G
11347	Female	60	0	G/G	G/G	G/G
11373	Male	20	0	G/G	G/G	G/G
11589	Male	52	0	G/G	G/G	G/G
C1046	Male	21	0	G/G	G/G	G/G
C1178	Male	26	0	G/G	G/G	G/A
C294	Male	60	0	G/G	G/G	G/G
C815	Female	23	0	G/G	G/G	G/G
Z8	Male	42	0	G/G	G/G	G/A
612	Male	42	0	G/G	G/G	G/G
10204	Male	38	0	G/G	G/G	G/G
10277	Female	20	0	G/G	G/G	G/G
123	Male	30	0	G/G	G/G	G/G
455	Male	26	0	G/G	G/C	G/G
588	Male	43	0	NA	G/G	G/G
606	Female	23	0	G/A	G/G	G/G
1703	Male	26	0	G/A	G/G	G/G
2178	Male	36	0	G/A	G/C	G/A
10135	Male	29	0	G/A	G/G	G/G
10136	Female	58	0	G/A	C/C	G/A
10622	Male	31	0	G/A	G/C	G/G
10659	Female	31	0	G/A	G/C	G/G
10823	Male	28	0	G/A	G/C	G/A
10922	Female	46	0	G/A	G/C	G/G
11538	Male	31	0	G/A	G/G	G/G
30008	Female	38	0	G/A	G/G	G/A
C236	Female	47	0	G/A	G/C	G/G
C246	Male	50	0	G/A	G/G	G/G
C388	Female	19	0	G/A	G/C	G/G
C483	Male	24	0	G/A	G/C	G/G
C509	Male	32	0	G/A	G/G	G/G
C683	Female	36	0	G/A	G/G	G/G
C813	Female	26	0	G/A	G/G	G/G
10951	Male	48	0	G/A	G/G	G/A
40026	Male	45	0	G/A	G/G	G/G
627	Female	21	0	G/A	G/C	G/G
1512	Male	32	0	G/A	G/G	G/A
1580	Female	46	0	G/A	G/C	G/A
1821	Male	41	0	G/A	C/C	G/A
3503	Female	45	0	G/A	G/G	G/A
3523	Male	52	0	G/A	G/C	G/G
3589	Male	53	0	G/A	G/C	G/G
3614	Male	27	0	G/G	G/C	G/G
3800	Male	19	0	G/A	G/C	G/G
4098	Female	32	0	G/A	G/G	G/G
4116	Male	28	0	G/A	G/C	G/A
4139	Male	19	0	G/A	C/C	G/G
10326	Female	30	0	G/A	G/C	G/G
10376	Male	38	0	G/G	G/C	G/G
10496	Male	38	0	G/A	G/C	G/G
10516	Female	44	0	G/A	G/C	G/G
10554	Female	33	0	G/A	C/C	G/G
10562	Female	42	0	G/A	G/G	G/G
10585	Male	53	0	G/A	G/C	G/G
10612	Male	27	0	G/A	G/C	G/G
10632	Male	28	0	G/A	G/C	G/G
10644	Male	53	0	G/A	G/G	G/G
10678	Male	32	0	G/A	G/G	G/G
10909	Male	45	0	G/A	G/C	G/G
10912	Male	52	0	G/A	G/G	G/G
10977	Female	25	0	G/A	G/G	G/G
11245	Male	17	0	G/A	G/G	G/G
11269	Female	36	0	G/A	G/C	G/G
30030	Female	40	0	G/A	G/G	G/G
40001	Male	25	0	G/A	G/G	G/G
40013	Male	51	0	G/A	G/G	G/G
40113	Male	18	0	G/A	G/G	G/G
C1176	Male	39	0	G/A	G/C	G/G
C266	Male	27	0	G/A	G/G	G/G
C714	Male	43	0	G/A	C/C	G/G
C848	Female	52	0	G/A	G/C	G/G
T20	Female	53	0	G/A	G/C	G/G
1245	Male	35	0	G/A	G/G	G/G
10062	Female	18	0	G/A	C/C	G/G
10105	Male	26	0	G/A	G/G	G/G
10545	Female	18	0	G/A	G/G	G/G
C443	Male	29	0	G/A	C/C	G/G
533	Male	53	0	G/A	G/C	G/G
604	Female	31	0	G/A	G/C	G/G
1205	Female	29	0	G/A	G/G	G/G
10145	Female	31	0	G/A	G/G	G/G
10373	Female	33	0	G/A	G/G	G/A
10377	Male	36	0	G/A	G/G	G/A
10531	Male	38	0	G/A	G/G	G/A
10605	Male	51	0	G/A	G/C	G/G
10630	Male	53	0	G/A	G/G	G/G
10706	Female	51	0	G/A	G/C	G/G
10762	Female	41	0	G/A	G/C	G/A
11272	Female	33	0	G/A	G/G	G/G
40146	Female	29	0	G/A	G/C	G/G
C1185	Male	27	0	G/A	G/C	G/A
10512	Male	20	0	G/A	G/C	G/G
119	Male	21	0	G/A	G/C	G/G
10956	Male	41	0	G/A	G/G	G/G
10965	Female	32	0	G/A	G/G	G/G
11063	Male	20	0	G/A	G/C	G/G
C1188	Female	27	0	G/A	G/C	G/G
C211	Female	18	0	G/A	G/C	G/G
C237	Female	34	0	G/A	G/C	G/G
C357	Male	30	0	G/A	G/G	G/G
C634	Female	24	0	G/A	G/C	G/G
T7	Female	28	0	G/A	G/G	G/A
435	Male	32	0	G/A	G/G	G/G
C1183	Female	26	0	G/A	G/G	G/G
C17	Male	25	0	G/A	C/C	G/G
C290	Male	26	0	G/A	G/G	G/G
10790	Female	31	0	G/A	G/G	G/G
14	Female	45	0	G/A	G/C	G/G
576	Female	38	0	G/A	G/G	G/G
582	Male	36	0	G/A	G/G	G/A
1214	Male	24	0	G/A	G/G	G/G
1239	Male	27	0	G/A	G/G	G/G
1240	Male	31	0	G/A	G/C	G/G
1267	Male	53	0	G/A	G/C	G/G
1288	Male	47	0	G/A	G/G	G/G
2033	Male	34	0	G/A	G/C	G/G
2181	Male	55	0	G/A	G/G	G/G
2218	Male	26	0	G/A	G/C	G/G
3652	Male	24	0	G/A	G/C	G/G
3956	Male	36	0	G/A	G/G	G/G
4038	Female	48	0	G/A	G/G	G/A
10004	Female	31	0	G/A	G/C	G/G
10034	Male	48	0	G/A	G/C	G/G
10146	Male	18	0	G/G	G/G	G/G
10360	Male	25	0	G/A	G/C	G/G
10436	Female	28	0	G/A	G/C	G/G
10449	Male	18	0	G/A	G/C	G/A
10540	Male	23	0	G/A	G/G	G/G
10652	Male	28	0	G/A	G/C	G/G
10800	Male	30	0	G/A	G/C	G/G
10935	Male	24	0	G/A	G/G	G/G
10985	Female	25	0	G/A	G/C	G/A
11361	Male	35	0	G/A	G/C	G/G
11495	Male	36	0	G/A	G/C	G/G
40033	Male	45	0	G/A	G/C	G/G
C1113	Female	49	0	G/A	G/G	G/G
C1402	Male	36	0	G/A	G/G	G/G
C188	Female	38	0	G/A	G/C	G/G
C229	Female	36	0	G/A	G/G	G/G
C264	Female	21	0	G/A	G/C	G/G
C371	Female	19	0	G/A	G/G	G/G
C440	Male	54	0	G/A	G/C	G/A
C465	Female	51	0	G/A	G/G	G/G
Z13	Male	53	0	G/A	G/C	G/G
Z21	Female	24	0	G/A	G/G	G/G
10952	Female	31	0	G/A	G/G	G/G
62	Female	19	0	G/A	G/C	G/G
610	Female	34	0	G/A	G/C	G/G
1634	Female	28	0	G/G	G/C	G/G
1983	Male	35	0	G/A	G/G	G/G
2424	Male	40	0	G/A	G/G	G/G
2718	Female	47	0	G/A	G/G	G/G
3141	Male	48	0	G/A	G/G	G/G
3463	Male	38	0	G/A	G/C	G/G
3552	Male	25	0	G/A	G/C	G/G
3610	Female	32	0	G/A	G/G	G/G
10263	Female	55	0	G/A	G/G	G/G
10374	Female	35	0	G/A	G/G	G/G
10411	Male	35	0	G/A	G/C	G/G
10705	Female	50	0	G/A	G/C	G/G
10767	Female	33	0	G/A	G/G	G/G
10804	Female	55	0	G/A	G/C	G/G
10814	Male	45	0	G/A	G/C	G/G
10848	Female	31	0	G/A	G/G	G/G
10978	Male	47	0	G/A	G/C	G/G
11298	Male	42	0	G/A	G/C	G/G
11312	Female	51	0	G/A	G/G	G/A
11394	Male	19	0	G/A	G/G	G/G
11428	Female	55	0	G/A	G/G	G/A
11549	Male	53	0	G/A	G/C	G/G
11800	Male	20	0	G/A	G/G	G/G
30004	Male	22	0	G/A	G/C	G/G
40039	Male	27	0	G/A	G/G	G/A
40061	Male	21	0	G/A	G/C	G/G
40110	Male	20	0	G/A	G/C	G/G
40128	Female	24	0	G/A	G/C	G/G
40196	Female	28	0	G/A	G/C	G/G
C1074	Female	32	0	G/A	G/C	G/G
C223	Female	19	0	G/A	C/C	G/G
C318	Female	34	0	G/A	C/C	G/G
C340	Female	21	0	G/A	G/G	G/G
C413	Male	21	0	G/A	G/G	G/G
C569	Male	40	0	G/A	G/G	G/G
C604	Male	22	0	G/A	G/C	G/G
C935	Female	18	0	G/A	G/C	G/G
C927	Male	30	0	G/A	G/G	G/G
10355	Female	35	0	G/A	G/G	G/G
438	Female	30	0	G/A	G/C	G/G
11090	Female	52	0	G/A	G/G	G/G
11096	Female	38	0	G/A	G/C	G/G
30003	Male	37	0	G/A	G/C	G/G
40172	Male	38	0	G/A	G/G	G/A
C220	Male	33	0	G/A	G/G	G/G
185	Male	38	0	G/A	G/G	G/G
193	Female	29	0	G/A	G/G	G/G
255	Male	36	0	G/A	G/G	G/G
276	Male	34	0	G/A	G/C	G/G
280	Female	18	0	G/A	G/C	G/G
296	Male	42	0	G/A	G/C	G/G
341	Male	24	0	G/A	G/G	G/G
350	Male	26	0	G/A	G/G	G/G
458	Female	20	0	G/G	G/C	G/G
523	Male	39	0	G/A	G/G	G/G
618	Male	23	0	G/A	G/G	G/G
659	Male	29	0	G/A	G/C	G/G
723	Female	37	0	G/A	G/C	G/G
824	Male	32	0	G/A	G/C	G/G
949	Male	44	0	G/A	G/G	G/G
987	Male	21	0	G/A	G/C	G/G
1008	Male	20	0	G/A	G/G	G/G
1021	Female	25	0	G/A	G/G	G/G
1119	Male	54	0	G/A	G/C	G/G
1231	Male	46	0	G/A	G/C	G/A
1962	Male	43	0	G/A	G/G	G/G
2140	Female	32	0	G/A	G/C	G/A
2222	Male	37	0	G/A	G/G	G/G
2354	Male	18	0	G/A	G/G	G/G
2392	Female	30	0	G/A	G/C	G/G
3379	Male	23	0	G/A	C/C	G/G
3488	Male	26	0	G/A	G/G	G/G
3665	Female	25	0	G/A	G/G	G/G
4087	Male	23	0	G/A	G/G	G/G
10108	Male	51	0	G/A	G/C	G/G
10144	Male	53	0	G/A	G/G	G/A
10150	Female	52	0	G/A	G/C	G/G
10178	Male	48	0	G/A	G/C	G/G
10182	Female	41	0	G/A	G/C	G/G
10206	Male	50	0	G/A	G/G	G/G
10269	Male	60	0	G/A	G/G	G/G
10270	Female	50	0	G/A	G/C	G/G
10320	Male	33	0	G/A	G/G	G/A
10327	Male	34	0	G/A	G/G	G/A
10332	Male	22	0	G/A	G/C	G/G
10354	Female	18	0	G/A	G/C	G/G
10363	Female	28	0	G/A	G/G	G/G
10366	Female	25	0	G/A	G/G	G/G
10375	Male	36	0	G/A	G/G	G/A
10463	Female	18	0	G/A	G/G	G/G
10477	Male	44	0	G/A	G/G	G/G
10497	Male	36	0	G/A	G/G	G/A
10519	Male	25	0	G/A	G/C	G/A
10529	Male	29	0	G/A	G/C	G/G
10546	Male	24	0	G/A	G/G	G/A
10558	Female	43	0	G/A	G/C	G/G
10593	Female	60	0	G/A	G/C	G/G
10623	Female	42	0	G/A	G/G	G/G
10661	Female	25	0	G/A	G/C	G/A
10716	Male	52	0	G/A	G/C	G/G
10776	Male	53	0	G/A	G/G	G/G
10815	Male	36	0	G/A	G/C	G/G
10954	Female	32	0	G/A	G/C	G/G
10957	Female	34	0	G/A	G/G	G/G
10970	Female	28	0	G/A	G/C	G/G
10976	Female	20	0	G/A	G/G	G/G
10995	Female	32	0	G/A	G/G	G/A
11051	Female	33	0	G/A	G/G	G/A
11055	Female	51	0	G/A	G/G	G/G
11061	Male	53	0	G/A	G/G	G/G
11066	Female	53	0	G/A	G/C	G/G
11108	Male	56	0	G/A	C/C	G/G
11223	Male	37	0	G/A	G/C	G/G
11244	Male	42	0	G/A	G/G	G/G
11355	Male	30	0	G/A	G/G	G/G
11378	Male	22	0	G/A	G/G	G/G
11389	Male	25	0	G/A	G/C	G/G
11409	Male	42	0	G/A	G/G	G/A
11444	Female	19	0	G/A	G/G	G/G
30005	Male	38	0	G/A	G/C	G/A
30009	Female	28	0	G/A	G/C	G/G
30016	Male	43	0	G/A	G/G	G/A
40002	Male	23	0	G/G	G/G	G/G
40041	Male	43	0	G/A	G/G	G/A
40114	Male	46	0	G/A	G/G	G/G
C1058	Male	44	0	G/A	G/G	G/G
C245	Male	36	0	G/A	G/C	G/G
C307	Female	34	0	G/A	G/C	G/G
C355	Male	33	0	G/A	G/G	G/G
C412	Female	41	0	G/A	G/C	G/G
C426	Female	23	0	G/A	G/C	G/G
C462	Male	41	0	G/A	G/G	G/A
C598	Male	40	0	G/A	G/C	G/G
C621	Female	26	0	G/A	G/C	G/G
C660	Female	36	0	G/A	G/G	G/G
C661	Female	33	0	G/A	G/C	G/G
T5	Female	45	0	G/A	G/G	G/A
Z22	Male	34	0	G/A	G/G	G/A
142	Male	29	0	G/A	G/G	G/G
11253	Female	34	0	G/A	G/G	G/G
C1059	Male	43	0	G/A	G/C	G/G
C351	Male	51	0	G/A	G/G	G/G
3516	Male	23	0	G/A	G/G	G/G
3825	Male	33	0	G/A	G/G	G/G
10286	Male	39	0	G/A	G/C	G/G
10958	Male	29	0	G/A	G/C	G/G
11627	Female	70	0	G/A	G/C	G/G
10028	Female	27	0	G/A	G/C	G/G
10351	Female	28	0	G/A	G/C	G/G
11056	Male	70	0	G/A	G/C	G/G
C466	Female	51	0	G/A	G/C	G/A
T12	Male	62	0	G/A	G/G	G/G
213	Male	32	0	G/A	G/C	G/G
1516	Female	28	0	G/A	G/G	G/A
1712	Female	28	0	G/A	G/C	G/G
10419	Female	19	0	G/A	G/G	G/G
10955	Male	28	0	G/A	G/G	G/A
C1167	Male	54	0	G/A	G/G	G/G
C1187	Male	23	0	G/A	G/G	G/G
T4	Female	52	0	G/A	G/G	G/G
10147	Female	28	0	G/A	G/G	G/G
10334	Male	21	0	G/A	G/C	G/A
10530	Female	23	0	G/A	G/C	G/A
10751	Female	24	0	G/A	G/C	G/G
138	Female	43	0	G/A	G/C	G/G
173	Female	27	0	G/A	G/C	G/G
551	Male	31	0	G/A	G/G	G/G
10513	Female	22	0	G/A	G/C	G/G
10726	Female	18	0	G/A	G/C	G/G
30020	Male	26	0	G/A	G/G	G/G
40028	Female	27	0	G/A	G/C	G/G
40169	Male	22	0	G/A	G/G	G/G
C224	Male	20	0	G/A	G/C	G/G
C522	Male	33	0	G/A	G/C	G/G
1244	Female	23	0	G/A	G/G	G/G
1525	Female	23	0	G/G	G/C	G/G
2169	Female	27	0	G/G	G/G	G/G
4125	Male	26	0	G/A	G/G	G/G
10001	Male	38	0	G/A	G/G	G/G
10828	Female	23	0	G/A	G/C	G/G
10061	Male	48	0	G/A	G/G	G/A
10868	Male	54	0	G/A	G/G	G/G
40075	Male	40	0	G/A	G/C	G/A
C1139	Male	20	0	G/A	G/C	G/G
10282	Male	22	0	G/A	G/C	G/G
602	Male	27	0	G/A	G/C	G/G
10148	Male	23	0	G/A	G/G	G/G
10343	Male	25	0	G/A	G/G	G/G
40038	Male	19	0	G/A	C/C	G/G
40122	Male	42	0	G/A	G/G	G/G
C277	Female	34	0	G/A	G/C	G/G
C303	Female	22	0	G/A	G/G	G/G
1241	Female	34	0	G/A	G/G	G/G
738	Female	29	0	G/A	G/G	G/G
747	Male	54	0	G/A	G/C	G/G
749	Male	45	0	G/A	G/C	G/G
773	Female	31	0	G/A	G/G	G/G
901	Male	50	0	G/G	G/G	G/G
914	Male	47	0	G/A	G/G	G/G
945	Female	30	0	G/A	G/C	G/G
981	Male	51	0	G/A	G/C	G/G
1001	Female	26	0	G/A	G/C	G/G
1067	Male	52	0	G/A	C/C	G/G
1071	Female	30	0	G/A	G/C	G/A
1074	Female	33	0	G/A	G/G	G/G
1107	Female	40	0	G/A	G/C	G/A
1108	Female	30	0	G/A	G/G	G/G
1109	Female	30	0	G/A	G/C	G/A
1111	Female	26	0	G/A	G/C	G/G
1112	Female	27	0	G/A	C/C	G/G
1115	Female	59	0	G/A	G/C	G/A
1118	Male	25	0	G/A	G/C	G/G
1125	Female	31	0	G/A	G/C	G/G
1131	Female	47	0	G/A	G/G	G/G
1139	Male	38	0	G/A	G/G	G/G
1140	Male	53	0	G/A	G/C	G/G
1141	Female	21	0	G/A	G/C	G/G
1142	Male	22	0	G/A	G/C	G/G
1148	Female	18	0	G/A	G/C	G/G
1158	Male	22	0	G/A	C/C	G/G
1160	Male	33	0	G/A	G/G	G/G
1161	Female	31	0	G/A	G/G	G/A
10068	Female	51	0	G/A	G/C	G/G
10110	Male	31	0	G/A	G/C	G/G
C46	Female	28	0	G/A	G/G	G/G
293	Male	38	0	G/A	G/C	G/G
669	Female	30	0	G/A	G/G	G/A
721	Female	28	0	G/A	G/C	G/G
815	Female	24	0	G/A	G/G	G/G
823	Male	25	0	G/A	G/G	G/G
1154	Female	26	0	G/A	G/G	G/G
10060	Male	29	0	G/A	G/C	G/A
251	Male	18	0	G/A	G/G	G/G
31	Male	50	0	G/A	G/C	G/G
976	Male	52	0	G/A	G/C	G/G
1138	Male	24	0	G/G	G/C	G/G
288	Male	48	0	G/A	G/G	G/G
260	Female	52	0	G/A	G/C	G/G
20	Male	20	0	G/A	G/G	G/A
285	Female	27	0	G/A	G/C	G/G
231	Female	22	0	G/A	G/C	G/G
552	Male	39	0	G/A	G/C	G/A
592	Female	27	0	G/A	G/C	G/G
921	Female	39	0	G/A	G/C	G/G
947	Male	38	0	G/A	G/C	G/G
927	Male	22	0	G/A	G/C	G/G
1019	Female	19	0	A/A	G/G	G/G
156	Female	38	0	G/A	G/G	G/G
596	Female	28	0	G/A	G/C	G/G
337	Male	35	0	G/A	G/C	G/G
C624	Female	34	0	NA	NA	NA
157	Male	51	0	NA	G/G	NA
164	Male	19	0	NA	NA	NA
583	Female	26	0	NA	G/G	G/A
C293	Female	38	0	G/A	G/G	G/G
11304	Female	35	0	G/A	G/G	G/G
10008	Male	24	0	A/A	NA	G/G
C1071	Male	39	0	G/A	G/G	G/G
303	Female	35	0	NA	G/C	G/G
11580	Female	28	0	G/A	G/G	G/G
